# Supplementary material
Source: PubMed Central journal article supplement (PMC4508442)
Supplement: JCM.00756-15_jcm00190-16_Supp_1_seq3.pdf [file JCM.00756-15_jcm00190-16_Supp_1_seq3.pdf]

**Supplementary Table S1. Amplification primers for long-range HIV genotyping**

| Primer                        | Primer sequence, 5' → 3'               | HXB2 location |
|-------------------------------|----------------------------------------|---------------|
| First round PCR (RT-PCR):     |                                        |               |
| OFM19                         | GCA CTC AAG GCA AGC TTT ATT GAG GCT TA | 9,632–9,604   |
| SK145                         | AGT GGG GGG ACA TCA AGC AGC CAT        | 1,359–1,382   |
| Second round PCR, Amplicon 1: |                                        |               |
| Pan-HIV-1_2F                  | GGG AAG TGA CAT AGC AGG AAC            | 1,485–1,505   |
| Pan-HIV-1_2R                  | CTG CCA TCT GTT TTC CAT AGT C          | 5,037–5,058   |
| Second round PCR, Amplicon 2: |                                        |               |
| Pan-HIV-1_4F                  | CCT ATG GCA GGA AGA AGC G              | 5,967–5,985   |
| Pan-HIV-1_4R                  | CTT ATA TGC AGC ATC TGA GGG            | 9,497–9,517   |

**Supplementary Table S2. Sequencing primers for long-range HIV genotyping (direct sequencing of amplicon 1)**

| Primer                                                                   | Primer sequence, 5' → 3'           | HXB2 location |
|--------------------------------------------------------------------------|------------------------------------|---------------|
| <b>Major set of sequencing primers</b>                                   |                                    |               |
| 1340L                                                                    | CTA TGT GCC CTT CCT TGC            | 1,976–1,993   |
| 981U-M                                                                   | AAT GTA TAG CCC TGT YAG            | 1,614–1,631   |
| 1870U-M                                                                  | TTG GCT GAG GCA ATG AG             | 1,876–1,892   |
| 1959L-M                                                                  | CAT TGT TTA ACC TTT GGG            | 2,611–2,628   |
| 2481U                                                                    | GAA ATA GGG CAA CAT AGA            | 3,129–3,146   |
| CR3268                                                                   | GTC CAT TTR TCA GGA TGG AGY TCA T  | 3,244–3,265   |
| SQ6.5FC                                                                  | GCA GAG TTA GAA TTA GCA GAG AAC AG | 3,444–3,469   |
| 3153L                                                                    | TAC TAG GGG AGG GGT ATT            | 3,801–3,818   |
| 3658L                                                                    | CTA TGG GTG GCA GAT TAA            | 4,306–4,323   |
| CR10                                                                     | ATT GTG GAT GAA TAC TGC C          | 4,763–4,781   |
| Pan-HIV-1_2R-M                                                           | CTG CCA TCT GTT TTC CAT AGT C      | 5,037–5,058   |
| SQ8FC                                                                    | CCT GGT AGC AGT CCA TGT AGC        | 4,448–4,468   |
| <b>Alternate primers for re-sequencing problematic regions (if any):</b> |                                    |               |
| Pan-HIV-1_2F-M                                                           | GGG AAG TGA CAT AGC AGG AAC        | 1,485–1,505   |
| 984L                                                                     | ATG CTG ACA GGG CTA TAC            | 1,617–1,634   |
| 1329U                                                                    | TTT CAA CTG TGG CAA GGA            | 1,965–1,982   |
| SQ14R(3)C                                                                | TCG AAT CTG AAG CTC TCT GCT GGT G  | 2,162–2,180   |
| 2546-M                                                                   | CCA TTG AAA CTG TAC CAG            | 2,561–2,577   |
| 1954U                                                                    | GCC CAA AGG TTA AAC AAT            | 2,602–2,619   |
| 2473L                                                                    | GCC CTA TTT CTA AGT CAG            | 3,121–3,138   |
| 2973U                                                                    | AGG ACT GCC CAC ACT AAT            | 3,621–3,638   |
| 2975L                                                                    | TCA TTA GTG TGG GCA GTC            | 3,623–3,640   |
| 3110U                                                                    | AGA CTA TTG GCA AGC CAC            | 3,758–3,775   |
| 3891L                                                                    | TGG CCA TCT TCC TGC TAA            | 4,539–4,556   |
| 3969U                                                                    | TGT TGG TGG GCA GGT ATC            | 4,617–4,634   |

**Supplementary Table S3. Sequencing primers for long-range HIV genotyping (clone sequencing)**

| Primer            | Primer sequence, 5' → 3'                   | HXB2 location |
|-------------------|--------------------------------------------|---------------|
| <b>Amplicon 1</b> |                                            |               |
| pMini_F           | ACC TGC CAA CCA AAG CGA GAA C              | N/A           |
| pMini_R           | TCA GGG TTA TTG TCT CAT GAG CG             | N/A           |
| 1870U-M           | TTG GCT GAG GCA ATG AG                     | 1,876–1,892   |
| 1959L-M           | CAT TGT TTA ACC TTT GGG                    | 2,611–2,628   |
| CR3268            | GTC CAT TTR TCA GGA TGG AGY TCA T          | 3,244-3,265   |
| SQ6.5FC           | GCA GAG TTA GAA TTA GCA GAG AAC AG         | 3,444-3,469   |
| 3153L             | TAC TAG GGG AGG GGT ATT                    | 3,801–3,818   |
| CR10              | ATT GTG GAT GAA TAC TGC C                  | 4,763-4,781   |
| <b>Amplicon 2</b> |                                            |               |
| pMini_F           | ACC TGC CAA CCA AAG CGA GAA C              | N/A           |
| pMini_R           | TCA GGG TTA TTG TCT CAT GAG CG             | N/A           |
| 6256L             | TTA CAC TTT AGA ATC GCA                    | 6,893–6,910   |
| ED5               | ATG GGA TCA AAG CCT AAA GCC ATG TG         | 6,557–6,582   |
| ED12              | AGT GCT TCC TGC TGC TCC CAA GAA CCC<br>AAG | 7,782–7,811   |
| 7182U             | TGA CGG TAC AGG CCA GAC                    | 7,834–7,851   |
| 7724L             | GTT TGG GGT AAG GGT CTG                    | 8,376–8,393   |
| 7847U             | CGA CCT GCG GAG CCT GTG C                  | 8,498–8,516   |

Supplementary Table S4. Distribution of selected drug-resistance mutations associated with APOBEC-induced hypermutations in MPP HIV-1C sequences (D30N, M46I and G73N are within Protease; D67, K103N and M184I are within Reverse Transcriptase; and E138K is within Integrase; drug-resistant mutations are highlighted).

| MPP sequences, n=36 | Selected drug-resistance mutations |      |      |      |       |       |       | Muts/<br>seq<br>length | Hypermut<br>ratio |
|---------------------|------------------------------------|------|------|------|-------|-------|-------|------------------------|-------------------|
|                     | D30N                               | M46I | G73S | D67N | K103N | M184I | E138K |                        |                   |
| mpp_00255_amp1      | AAT                                | ATA  | GGT  | GAC  | AAA   | ATA   | GAA   | 0.034                  | 4.64              |
| mpp_00267_amp1      | GAT                                | ATG  | GGT  | GAC  | AAC   | ATG   | GAA   | 0.003                  | 0.63              |
| mpp_00318_amp1      | GAT                                | ATG  | AGT  | GAC  | AAA   | ATA   | GAA   | 0.025                  | 3.79              |
| mpp_00018_amp1      | AAT                                | ATA  | AGT  | GAC  | AAA   | ATA   | AAA   | 0.082                  | 3.61              |
| mpp_00419_amp1      | GAT                                | ATG  | AGT  | GAC  | AAA   | ATA   | GAA   | 0.030                  | 4.13              |
| mpp_00450_amp1      | GAT                                | ATG  | GGT  | GAC  | AAA   | ATA   | GAA   | 0.021                  | 2.3               |
| mpp_00283_amp1      | GAT                                | ATG  | AGT  | GAC  | AAA   | ATA   | GAA   | 0.037                  | 4.86              |
| mpp_00136_amp1      | GAT                                | ATG  | GGT  | GAC  | AAA   | ATA   | GAA   | 0.018                  | 3.58              |
| mpp_00274_amp1      | GAT                                | ATG  | AGT  | GAT  | AAA   | ATA   | GAG   | 0.046                  | 6.32              |
| mpp_00142_amp1      | AAT                                | ATA  | AGT  | AAC  | AAA   | ATA   | AAA   | 0.075                  | 3.54              |
| mpp_00147_amp1      | GAT                                | ATG  | AGT  | GAC  | AAA   | ATG   | GAA   | 0.037                  | 6.66              |
| mpp_00378_amp1      | GAT                                | ATA  | AGT  | GAC  | AAA   | ATA   | GAA   | 0.058                  | 8.77              |
| mpp_00162_amp1      | GAT                                | ATG  | AGT  | GAC  | AAA   | ATA   | GAA   | 0.031                  | 5.2               |
| mpp_00124_amp1      | AAT                                | ATG  | AGT  | GAC  | AAA   | ATA   | AAA   | 0.057                  | 6.17              |
| mpp_00032_amp1      | AAT                                | ATA  | AGT  | GAC  | AAA   | ATG   | GAA   | 0.051                  | 3.07              |
| mpp_00470_amp1      | GAT                                | ATG  | GGT  | GAC  | AAA   | ATA   | GAA   | 0.023                  | 4.23              |
| mpp_00275_amp1      | GAT                                | ATG  | GGT  | GAC  | AAA   | ATA   | GAA   | 0.033                  | 5.34              |
| mpp_00134_amp1      | AAT                                | ATA  | AGT  | GAC  | AAC   | ATA   | GAA   | 0.044                  | 5.91              |
| mpp_00105_amp1      | GAT                                | ATG  | GGT  | GAC  | AAA   | ATA   | GAA   | 0.032                  | 3.65              |
| mpp_00328_amp1      | AAT                                | ATA  | GGT  | GAC  | AAA   | ATA   | AAA   | 0.061                  | 4.32              |
| mpp_00416_amp1      | GAT                                | ATG  | GGT  | GAC  | AAA   | ATA   | GAA   | 0.031                  | 3.8               |
| mpp_00248_amp1      | GAT                                | ATG  | GGT  | GAC  | AAG   | ATA   | GAA   | 0.028                  | 3.89              |
| mpp_00212_amp1      | GAT                                | ATG  | GGT  | GAC  | AAA   | ATA   | GAA   | 0.030                  | 3.94              |
| mpp_00137_amp1      | AAT                                | ATA  | GGT  | AAC  | AAA   | ATG   | AAA   | 0.054                  | 3.73              |
| mpp_00199_amp1      | GAT                                | ATG  | GGT  | GAC  | AAT   | ATG   | GAA   | 0.005                  | 1.28              |
| mpp_00411_amp1      | GAT                                | ATG  | AGT  | GAC  | AAA   | ATG   | GAA   | 0.027                  | 5.2               |
| mpp_00309_amp1      | GAT                                | ATG  | AGC  | GAC  | AAA   | ATA   | GAA   | 0.041                  | 5.45              |
| mpp_00476_amp1      | GAT                                | ATG  | AGT  | GAC  | AAA   | ATA   | GAA   | 0.028                  | 4.66              |
| mpp_00148_amp1      | AAT                                | ATA  | GGT  | GAT  | AAA   | ATA   | GAA   | 0.046                  | 3.7               |
| mpp_00214_amp1      | AAT                                | ATG  | AAG  | GAC  | AAA   | ATA   | GAA   | 0.040                  | 6.92              |
| mpp_00446_amp1      | GAT                                | ATG  | GGT  | GAC  | AAA   | ATA   | GAA   | 0.006                  | 1.38              |
| mpp_00234_amp1      | GAT                                | ATG  | AGT  | GAC  | AAA   | ATA   | GAA   | 0.051                  | 5.17              |
| mpp_00242_amp1      | GAT                                | ATG  | GGT  | GAC  | AAA   | ATA   | GAA   | 0.026                  | 3.07              |
| mpp_00206_amp1      | GAT                                | ATG  | AGT  | GAC  | AAA   | ATA   | GAA   | 0.043                  | 5.87              |
| mpp_00110_amp1      | GAT                                | ATG  | AGT  | GAC  | AAA   | ATA   | GAA   | 0.029                  | 5.73              |
| mpp_00491_amp1      | GAT                                | ATG  | AGT  | GAC  | AAA   | ATA   | GAA   | 0.031                  | 3.23              |

Supplementary Table S5. Distribution of selected drug-resistance mutations associated with APOBEC-induced hypermutations in BCPP HIV-1C sequences (D30N, M46I and G73N are within Protease; D67, K103N and M184I are within Reverse Transcriptase; and E138K is within Integrase; drug-resistant mutations are highlighted).

| BCPP sequences, n=46 | Selected drug-resistance mutations |      |      |      |       |       |       | Hypermut ratio | Muts/seq length |
|----------------------|------------------------------------|------|------|------|-------|-------|-------|----------------|-----------------|
|                      | D30N                               | M46I | G73S | D67N | K103N | M184I | E138K |                |                 |
| bcpp_00153_amp1      | AAT                                | ATG  | GGT  | GAC  | AAA   | ATA   | GAA   | 3.42           | 0.049           |
| bcpp_00452_amp1      | AAT                                | ATA  | AGT  | GAC  | AAA   | ATG   | GAA   | 3.37           | 0.043           |
| bcpp_00055_amp1      | AAT                                | ATA  | GGT  | GAT  | AAA   | ATG   | GAA   | 3.2            | 0.037           |
| bcpp_00110_amp1      | AAT                                | ATG  | GGT  | GAC  | AAA   | ATA   | GAA   | 5.01           | 0.039           |
| bcpp_00453_amp1      | GAT                                | ATA  | AGT  | GAC  | AAA   | ATA   | GAA   | 4.61           | 0.049           |
| bcpp_00032_amp1      | GAT                                | ATG  | AGT  | GAC  | AAA   | ATA   | AAA   | 5.77           | 0.034           |
| bcpp_00341_amp1      | GAT                                | ATG  | AGT  | GAC  | AAA   | ATA   | AAA   | 6.76           | 0.032           |
| bcpp_00462_amp1      | AAT                                | ATA  | GGT  | GAC  | AAA   | ATG   | AAA   | 3.49           | 0.059           |
| bcpp_00014_amp1      | GAT                                | ATG  | AGT  | GAC  | AAA   | ATA   | GAA   | 5.47           | 0.057           |
| bcpp_00440_amp1      | GAT                                | ATG  | AGT  | GAC  | AAA   | ATA   | GAA   | 6.18           | 0.037           |
| bcpp_00311_amp1      | GAT                                | ATG  | AGT  | GAT  | AAA   | ATA   | GAA   | 4.45           | 0.032           |
| bcpp_00458_amp1      | AAT                                | ATA  | AGT  | GAC  | AAA   | ATA   | AAA   | 3.26           | 0.049           |
| bcpp_00305_amp1      | GAC                                | ATA  | AGT  | GAC  | AAA   | ATA   | GAA   | 5.54           | 0.044           |
| bcpp_00085_amp1      | GAT                                | ATG  | AGT  | GAC  | AGA   | ATA   | GAA   | 4.09           | 0.028           |
| bcpp_00464_amp1      | GAC                                | ATA  | GGT  | AAT  | AAA   | ATA   | AAA   | 3.86           | 0.065           |
| bcpp_00350_amp1      | AAT                                | ATA  | GGT  | GAC  | AAA   | ATA   | AAA   | 3.47           | 0.060           |
| bcpp_00450_amp1      | GAT                                | ATG  | GGT  | GAC  | AAC   | ATG   | GAA   | 1.22           | 0.005           |
| bcpp_00070_amp1      | GAT                                | ATG  | AGT  | GAC  | AAG   | ATA   | GAA   | 3.24           | 0.027           |
| bcpp_00368_amp1      | GAT                                | ATA  | GGT  | GAC  | AAA   | ATA   | GAA   | 6.78           | 0.040           |
| bcpp_00100_amp1      | GAT                                | ATG  | GGT  | GAC  | AAA   | ATA   | GAA   | 3.2            | 0.023           |
| bcpp_00202_amp1      | AAT                                | ATA  | GGT  | GAC  | AAA   | ATG   | GAA   | 2.84           | 0.032           |
| bcpp_00140_amp1      | AAT                                | ATA  | GGT  | AAC  | AAA   | ATG   | AAA   | 2.79           | 0.029           |
| bcpp_00094_amp1      | GAT                                | ATA  | AGT  | GAC  | AAA   | ATT   | GAA   | 5.4            | 0.042           |
| bcpp_00027_amp1      | GAT                                | ATG  | GGT  | GAC  | AAT   | GTG   | GAA   | 1.41           | 0.005           |
| bcpp_00436_amp1      | GAT                                | ATG  | GGT  | GAC  | AAA   | ATA   | GAA   | 3.8            | 0.023           |
| bcpp_00415_amp1      | AAT                                | ATA  | GGT  | GAC  | AAG   | ATA   | GAA   | 2.4            | 0.031           |
| bcpp_00466_amp1      | GAT                                | ATA  | AGT  | GAC  | AAA   | ATA   | GAA   | 10.83          | 0.032           |
| bcpp_00363_amp1      | GAT                                | ATG  | AGT  | GAC  | AAA   | ATA   | GAA   | 3.42           | 0.032           |
| bcpp_00381_amp1      | GAT                                | ATA  | AGT  | GAC  | AAA   | ATA   | AAA   | 5.01           | 0.043           |
| bcpp_00442_amp1      | GAT                                | ATG  | GGT  | GAT  | AAC   | ATG   | GAA   | 0.78           | 0.004           |
| bcpp_00356_amp1      | GAT                                | ATG  | AGT  | GAC  | AAG   | ATG   | GAA   | 2.89           | 0.016           |
| bcpp_00234_amp1      | AAT                                | ATA  | GGT  | GAC  | AAA   | GTA   | AAA   | 3.74           | 0.045           |
| bcpp_00186_amp1      | GAT                                | ATG  | GGT  | GAT  | AAA   | ATA   | GAA   | 2.81           | 0.018           |
| bcpp_00109_amp1      | GAT                                | ATG  | GGT  | GAC  | AAA   | ATA   | GAA   | 4.69           | 0.035           |
| bcpp_00374_amp1      | AAT                                | ATG  | RGT  | GAC  | AAA   | ATA   | GAA   | 6.19           | 0.052           |
| bcpp_00445_amp1      | GAT                                | ATG  | GGT  | GAC  | AAC   | ATG   | GAA   | 0.84           | 0.004           |
| bcpp_00227_amp1      | GAT                                | ATA  | GGT  | GAC  | AAA   | ATG   | AAA   | 6.9            | 0.036           |

|                 |     |     |     |     |     |     |     |       |       |
|-----------------|-----|-----|-----|-----|-----|-----|-----|-------|-------|
| bcpp_00414_amp1 | GAT | ATG | GGT | GAC | AAT | ATG | GAA | 0.86  | 0.006 |
| bcpp_00190_amp1 | GAT | ATG | GGT | GAC | AAA | ATA | GAA | 4.62  | 0.022 |
| bcpp_00498_amp1 | GAT | ATG | GGT | GAC | AAA | ATA | GAA | 5.67  | 0.026 |
| bcpp_00051_amp1 | GAT | ATG | GGT | GAC | AAA | ATA | GAA | 3.96  | 0.025 |
| bcpp_00395_amp1 | GAT | ATT | GGT | AAC | AAA | ATG | GAA | 1.26  | 0.008 |
| bcpp_00171_amp1 | GAT | ATG | AGT | GAC | AAA | ATA | AAA | 4.39  | 0.039 |
| bcpp_00402_amp1 | GAT | ATG | GGT | GAC | AAA | ATA | GAA | 15.36 | 0.040 |
| bcpp_00257_amp1 | GAT | ATG | GGT | GAC | AAA | ATA | GAA | 7.1   | 0.047 |
| bcpp_00136_amp1 | GAT | ATG | GGT | AAC | AAC | GTG | GAA | 0.33  | 0.003 |

---
